# Supplementary material for: Structural and Functional Strategies in Cenchrus Species to Combat Environmental Extremities Imposed by Multiple Abiotic Stresses
Source: MDPI journal article supplement (doi:10.3390/plants13020203), 2024-01-11
Supplement: s1 [file s1]

**Supplementary Table S1a. Morphology, physiology and anatomy data of *Cenchrus pennisetiformis***

|                                                  | Control          | Drought          | Salinity         | Cold             |
|--------------------------------------------------|------------------|------------------|------------------|------------------|
| <b>Morphology</b>                                |                  |                  |                  |                  |
| Plant height (cm)                                | 60.20±6.01       | 23.70±1.7        | 28.57±1.87       | 24.57±1.72       |
| Root length (cm)                                 | 8.43±0.38        | 30.23±2.4        | 5.40±0.39        | 14.83±1.39       |
| Shoot fresh weight (g plant <sup>-1</sup> )      | 17.15±1.52       | 31.07±2.5        | 8.06±0.63        | 19.17±1.54       |
| Shoot dry weight (g plant <sup>-1</sup> )        | 7.06±0.36        | 12.54±0.10       | 2.86±1.37        | 7.81±0.63        |
| Root fresh weight (g plant <sup>-1</sup> )       | 15.40±1.49       | 12.33±0.98       | 4.67±0.35        | 7.57±0.66        |
| Root dry weight (g plant <sup>-1</sup> )         | 6.40±0.58        | 5.64±0.38        | 1.64±0.54        | 3.36±2.53        |
| Leaf area (cm <sup>2</sup> )                     | 305.89±29.7      | 126.04±10.42     | 69.92±5.86       | 134.97±12.65     |
| Number of leaves per plant                       | 42.43±3.6        | 70.37±5.87       | 36.33±2.85       | 34.50±3.16       |
| Inflorescence length (cm)                        | 3.55±0.18        | 4.53±0.37        | 3.50±0.25        | 16.70±1.43       |
| <b>Root anatomy</b>                              |                  |                  |                  |                  |
| Root radius (μm)                                 | 1366.38±129.7    | 932.12±89.7      | 569.93±4.980.    | 516.03±49.83     |
| Epidermis thickness (μm)                         | 69.05±5.57       | 76.31±6.81       | 0.00±0.00        | 0.00±0.00        |
| Cortical cell area (μm <sup>2</sup> )            | 2398.61±228.6    | 7040.19±699.11   | 805.88±78.3      | 5441.40±498.3    |
| Endodermis thickness (μm)                        | 41.79±3.95       | 41.79±3.82       | 34.52±2.91       | 38.16±2.94       |
| Pericycle thickness (μm)                         | 94.48±8.67       | 76.31±6.36       | 78.13±6.72       | 96.30±8.95       |
| Metaxylem area (μm <sup>2</sup> )                | 10896.64±1008.4  | 13446.57±1289.21 | 5193.24±4.98     | 5528.74±530.33   |
| Phloem area (μm <sup>2</sup> )                   | 2399.48±230.5    | 2049.28±198.91   | 1275.40±123.4    | 371.81±30.4      |
| Aerenchyma thickness (μm)                        | 436.08±40.51     | 381.57±35.83     | 0.00±0.00        | 0.00±0.00        |
| Pith thickness (μm)                              | 968.46±90.21     | 675.92±6.58      | 570.54±53.2      | 380.96±36.32     |
| <b>Stem anatomy</b>                              |                  |                  |                  |                  |
| Stem radius (μm)                                 | 1331.86±129.32   | 1221.02±119.34   | 932.12±90.32     | 1188.32±116.54   |
| Epidermis thickness (μm)                         | 29.07±2.70       | 42.40±3.91       | 59.96±4.82       | 61.78±5.83       |
| Cortical cell area (μm)                          | 48257.55±4002.67 | 28785.05±2400.23 | 19543.40±1890.21 | 26865.47±2640.75 |
| Metaxylem area (μm <sup>2</sup> )                | 38.16±3.42       | 43.61±3.98       | 29.07±2.53       | 59.96±5.44       |
| Vascular bundle area (μm <sup>2</sup> )          | 24098.51±2399.21 | 35745.69±3489.85 | 32183.23±3256.36 | 30056.13±3001.78 |
| Sclerenchyma thickness (μm)                      | 129.01±10.8      | 99.94±8.92       | 94.48±8.93       | 148.99±12.90     |
| Phloem area (μm <sup>2</sup> )                   | 3507.12±345.21   | 4021.61±399.21   | 5539.98±549.76   | 5028.95±487.54   |
| <b>Leaf sheath anatomy</b>                       |                  |                  |                  |                  |
| Leaf sheath thickness (μm)                       | 290.72±2.81      | 1108.37±108.53   | 508.76±49.81     | 454.25±43.23     |
| Epidermis thickness (μm)                         | 22.41±1.80       | 54.51±5.43       | 27.26±2.50       | 39.97±3.65       |
| Vascular bundle area (μm <sup>2</sup> )          | 34414.09±3354.67 | 47384.23±4677.08 | 36921.65±3500.06 | 46606.02±4500.22 |
| Sclerenchyma thickness (μm)                      | 54.51±4.90       | 127.19±11.91     | 127.19±11.87     | 145.36±12.34     |
| Parenchyma cell area (μm <sup>2</sup> )          | 3980.97±388.04   | 49459.45±4876.04 | 5360.99±533.07   | 2734.10±271.06   |
| <b>Leaf blade anatomy</b>                        |                  |                  |                  |                  |
| Epidermis thickness (μm)                         | 32.71±3.01       | 58.14±4.7        | 41.79±3.96       | 23.62±2.14       |
| Parenchyma cell area (μm <sup>2</sup> )          | 1718.98±167.87   | 2907.04±286.05   | 13579.73±1323.98 | 3168.17±313.65   |
| Mesophyll thickness (μm)                         | 96.30±94.03      | 132.64±11.80     | 127.19±11.6      | 93.88±9.23       |
| Metaxylem area (μm <sup>2</sup> )                | 2338.08±229.07   | 1814.95±178.04   | 2156.50±1978.54  | 1868.56±183.64   |
| Phloem area (μm <sup>2</sup> )                   | 3838.30±379.08   | 2798.09±276.03   | 7015.98±698.48   | 2658.01±263.47   |
| Vascular bundle area (μm <sup>2</sup> )          | 28785.05±2788.96 | 94405.29±9456.37 | 99452.40±9800.76 | 45317.65±4501.08 |
| Midrib thickness (μm)                            | 981.18±95.02     | 1295.52±127.66   | 639.58±62.83     | 585.07±57.63     |
| Lamina thickness (μm)                            | 387.02±36.40     | 388.84±36.07     | 459.70±43.82     | 387.02±35.52     |
| Bulliform area (μm <sup>2</sup> )                | 44167.63±4375.04 | 14228.24±1400.55 | 52883.57±5175.45 | 63008.92±6299.64 |
| Adaxial stomatal density per mm <sup>2</sup>     | 72.50±6.51       | 81.90±7.92       | 131.60±12.5      | 123.50±11.41     |
| Abaxial stomatal density per mm <sup>2</sup>     | 77.50±7.57       | 87.20±8.45       | 122.50±11.4      | 99.00±8.70       |
| Adaxial stomatal area (μm <sup>2</sup> )         | 309.50±29.87     | 221.90±20.66     | 211.40±20.8      | 218.50±19.91     |
| Abaxial stomatal area (μm <sup>2</sup> )         | 216.40±20.4      | 188.60±17.55     | 216.20±20.08     | 222.90±21.46     |
| <b>Physiology</b>                                |                  |                  |                  |                  |
| Total soluble proteins (μg g <sup>-1</sup> f w.) | 270.70±26.50     | 2901.28±289.11   | 3266.48±324.54   | 2716.93±270.17   |
| Total free amino acids (μg g <sup>-1</sup> f w.) | 2.74±0.21        | 7.42±0.73        | 14.84±1.39       | 4.03±0.38        |
| Total soluble sugars (mg g <sup>-1</sup> d w.)   | 16.72±1.43       | 26.23±2.44       | 20.93±1.98       | 16.70±1.56       |
| Glycine betaine (μmol g <sup>-1</sup> f w.)      | 33.25±3.11       | 52.51±4.91       | 37.51±3.64       | 50.04±4.98       |
| Proline (μmol g <sup>-1</sup> f w.)              | 75.15±7.42       | 250.27±2.12      | 311.10±31.44     | 183.56±17.34     |
| Chlorophyll <i>a</i> (mg g <sup>-1</sup> f w.)   | 1.17±0.01        | 2.00±0.2         | 1.41±0.11        | 1.00±0.10        |
| Chlorophyll <i>b</i> (mg g <sup>-1</sup> f w.)   | 0.70±0.006       | 1.10±0.01        | 0.83±0.07        | 0.63±0.06        |
| Total chlorophyll (mg g <sup>-1</sup> f w.)      | 1.87±0.16        | 3.10±0.33        | 2.25±0.24        | 1.64±0.15        |
| Shoot Na <sup>+</sup> (mg g <sup>-1</sup> f w.)  | 18.50±1.74       | 30.50±2.98       | 65.50±6.43       | 20.10±1.90       |
| Shoot K <sup>+</sup> (mg g <sup>-1</sup> f w.)   | 36.34±3.41       | 23.66±2.1        | 33.46±2.98       | 21.85±2.02       |
| Shoot Ca <sup>2+</sup> (mg g <sup>-1</sup> f w.) | 7.53±0.76        | 8.20±0.8         | 8.85±0.87        | 8.99±0.87        |
| Carotenoids (mg g <sup>-1</sup> f w.)            | 0.04±0.004       | 0.03±0.003       | 0.06±0.006       | 0.03±0.002       |

**Supplementary Table S1b. Morphology, physiology and anatomy data of *Cenchrus prieurii***

| Morphology                                       | Control          | Drought          | Salinity         | Cold             |
|--------------------------------------------------|------------------|------------------|------------------|------------------|
| Plant height (cm)                                |                  |                  |                  |                  |
| Root length (cm)                                 | 17.00±1.60       | 20.00±0.18       | 19.00±1.62       | 21.00±0.19       |
| Shoot fresh weight (g plant <sup>-1</sup> )      | 6.00±0.58        | 17.00±1.53       | 36.00±3.33       | 5.00±0.47        |
| Shoot dry weight (g plant <sup>-1</sup> )        | 27.35±2.41       | 14.82±1.37       | 22.20±1.82       | 9.97±0.85        |
| Root fresh weight (g plant <sup>-1</sup> )       | 10.55±1.04       | 5.69±0.48        | 8.62±0.84        | 3.75±0.29        |
| Root dry weight (g plant <sup>-1</sup> )         | 8.20±0.75        | 10.90±1.01       | 6.30±0.54        | 25.33±2.31       |
| Leaf area (cm <sup>2</sup> )                     | 3.36±0.29        | 4.24±0.37        | 2.77±0.19        | 11.50±0.98       |
| Number of leaves per plant                       | 36.99±3.57       | 40.10±3.82       | 205.72±19.4      | 49.98±4.64       |
| Inflorescence length (cm)                        | 32.00±2.91       | 29.00±2.51       | 55.00±4.83       | 35.00±3.32       |
| Root anatomy                                     |                  |                  |                  |                  |
| Root radius (μm)                                 | 781.31±70.13     | 1277.96±125.32   | 890.33±782.1     | 926.67±87.61     |
| Epidermis thickness (μm)                         | 55.12±4.72       | 55.12±4.81       | 27.26±2.11       | 45.43±3.92       |
| Cortical cell area (μm <sup>2</sup> )            | 3616.07±         | 3958.49±390.36   | 1980.11±193.42   | 1067.87±1000.56  |
| Endodermis thickness (μm)                        | 45.43±           | 55.12±4.72       | 54.51±4.98       | 36.95±2.90       |
| Pericycle thickness (μm)                         | 19.87±           | 50.88±4.91       | 19.81±1.83       | 22.35±1.88       |
| Metaxylem area (μm <sup>2</sup> )                | 8162.54±772.8    | 11018.56±1100.23 | 22789.39±2001.23 | 8108.06±790.0    |
| Phloem area (μm <sup>2</sup> )                   | 1067.87±105.4    | 4172.06±387.64   | 3184.60±298.7    | 2397.75±200.15   |
| Aerenchyma thickness (μm)                        | 198.66±17.63     | 0.00±0.00        | 0.00±0.00        | 91.46±8.53       |
| Pith thickness (μm)                              | 278.61±25.3      | 926.67±89.23     | 763.14±70.23     | 744.97±68.45     |
| Stem anatomy                                     |                  |                  |                  |                  |
| Stem radius (μm)                                 | 1285.22±120.65   | 1146.53±110.5    | 1221.02±120.32   | 986.03±90.54     |
| Epidermis thickness (μm)                         | 21.80±1.73       | 30.89±2.93       | 32.71±2.53       | 23.62±1.90       |
| Cortical cell area (μm)                          | 15690.41±1467.09 | 9207.07±888.20   | 7776.89±65.73    | 21244.22±2100.56 |
| Metaxylem area (μm <sup>2</sup> )                | 32.71±2.90       | 36.34±2.82       | 45.43±3.91       | 32.71±2.63       |
| Vascular bundle area (μm <sup>2</sup> )          | 20568.04±1998.03 | 35183.65±3401.65 | 38661.38±3777.21 | 30768.62±3002.45 |
| Sclerenchyma thickness (μm)                      | 58.14±5.32       | 109.02±9.74      | 145.36±12.62     | 72.68±6.72       |
| Phloem area (μm <sup>2</sup> )                   | 7377.41±690.02   | 13482.02±1267.23 | 11252.89±1173.89 | 5174.22±501.23   |
| Leaf sheath anatomy                              |                  |                  |                  |                  |
| Leaf sheath thickness (μm)                       | 617.78±59.36     | 563.27±54.33     | 368.25±34.7      | 999.35±95.6      |
| Epidermis thickness (μm)                         | 21.80±1.94       | 21.80±1.87       | 36.34±3.47       | 29.07±2.43       |
| Vascular bundle area (μm <sup>2</sup> )          | 35278.77±3467.89 | 31301.26±3003.55 | 45481.94±4400.03 | 79567.46±7850.05 |
| Sclerenchyma thickness (μm)                      | 63.60±5.91       | 72.68±68.98      | 54.51±5.21       | 90.85±8.91       |
| Parenchyma cell area (μm <sup>2</sup> )          | 11474.25±1009.63 | 15574.54±1408.75 | 2341.54±214.5    | 3150.88±301.77   |
| Leaf blade anatomy                               |                  |                  |                  |                  |
| Epidermis thickness (μm)                         | 58.14±5.62       | 55.12±5.32       | 45.43±44.32      | 55.12±5.42       |
| Parenchyma cell area (μm <sup>2</sup> )          | 4753.99±473.89   | 2002.07±199.73   | 7846.93±780.65   | 5244.26±522.43   |
| Mesophyll thickness (μm)                         | 218.65±21.40     | 222.28±21.14     | 195.02±19.22     | 145.97±14.21     |
| Metaxylem area (μm <sup>2</sup> )                | 989.19±97.81     | 1458.71±143.65   | 1021.36±100.46   | 1083.44±106.55   |
| Phloem area (μm <sup>2</sup> )                   | 4155.63±4002.58  | 7888.44±776.43   | 12583.63±1250.36 | 10106.33±9998.87 |
| Vascular bundle area (μm <sup>2</sup> )          | 25608.24±2498.43 | 54736.57±5300.65 | 39031.46±3897.04 | 44075.11±4401.44 |
| Midrib thickness (μm)                            | 436.69±42.67     | 963.62±95.43     | 645.64±63.42     | 473.03±46.32     |
| Lamina thickness (μm)                            | 327.67±31.43     | 490.59±48.06     | 393.68±39.4      | 327.67±31.75     |
| Bulliform area (μm <sup>2</sup> )                | 12516.18±1246.63 | 25086.84±2500.46 | 14023.31±1400.25 | 5235.61±516.57   |
| Adaxial stomatal density per mm <sup>2</sup>     | 73.80±7.26       | 75.80±7.23       | 65.30±6.31       | 80.40±7.90       |
| Abaxial stomatal density per mm <sup>2</sup>     | 77.80±7.54       | 82.50±7.91       | 66.80±6.55       | 79.40±7.84       |
| Adaxial stomatal area (μm <sup>2</sup> )         | 656.30±64.73     | 579.30±56.72     | 651.20±64.52     | 457.00±44.56     |
| Abaxial stomatal area (μm <sup>2</sup> )         | 644.30±63.62     | 536.30±53.54     | 548.00±50.86     | 455.80±43.57     |
| Physiology                                       |                  |                  |                  |                  |
| Total soluble proteins (μg g <sup>-1</sup> f w.) | 2695.86±265.89   | 3068.96±305.96   | 2658.55±264.87   | 1585.33±157.43   |
| Total free amino acids (μg g <sup>-1</sup> f w.) | 6.23±0.61        | 13.42±1.29       | 5.30±0.49        | 2.90±0.27        |
| Total soluble sugars (mg g <sup>-1</sup> d w.)   | 18.91±1.70       | 25.77±2.47       | 23.09±2.10       | 26.41±2.57       |
| Glycine betaine (μmol g <sup>-1</sup> f w.)      | 52.02±4.98       | 33.28±3.30       | 32.86±3.01       | 28.71±2.48       |
| Proline (μmol g <sup>-1</sup> f w.)              | 360.81±35.45     | 429.65±41.84     | 351.49±34.67     | 262.05±25.65     |
| Chlorophyll <i>a</i> (mg g <sup>-1</sup> f w.)   | 1.74±0.16        | 2.24±0.25        | 2.23±0.21        | 2.29±0.27        |
| Chlorophyll <i>b</i> (mg g <sup>-1</sup> f w.)   | 1.65±0.15        | 1.72±0.16        | 1.65±0.14        | 1.20±0.10        |
| Total chlorophyll (mg g <sup>-1</sup> f w.)      | 6.39±0.61        | 3.96±0.34        | 3.88±0.37        | 3.49±0.36        |
| Shoot Na <sup>+</sup> (mg g <sup>-1</sup> f w.)  | 25.60±2.48       | 31.50±2.95       | 49.70±4.86       | 16.20±1.57       |
| Shoot K <sup>+</sup> (mg g <sup>-1</sup> f w.)   | 22.42±2.01       | 28.71±2.65       | 32.57±3.42       | 21.81±1.96       |
| Shoot Ca <sup>2+</sup> (mg g <sup>-1</sup> f w.) | 8.12±0.89        | 10.90±1.01       | 8.17±0.80        | 8.17±0.78        |
| Carotenoids (mg g <sup>-1</sup> f w.)            | 0.03±0.003       | 0.01±0.001       | 0.03±0.003       | 0.09±0.009       |

**Supplementary Table S1c. Morphology, physiology and anatomy data of *Cenchrus setiger***

| Morphology                                       | Control          | Drought          | Salinity         | Cold             |
|--------------------------------------------------|------------------|------------------|------------------|------------------|
| Plant height (cm)                                |                  |                  |                  |                  |
| Root length (cm)                                 | 26.00±2.42       | 37.00±           | 35.02±2.71       | 29.00±0.19       |
| Shoot fresh weight (g plant <sup>-1</sup> )      | 6.09±0.58        | 9.09±            | 4.09±0.34        | 7.09±0.64        |
| Shoot dry weight (g plant <sup>-1</sup> )        | 24.07±2.21       | 18.94±           | 18.03±1.65       | 23.59±1.96       |
| Root fresh weight (g plant <sup>-1</sup> )       | 10.08±0.95       | 7.92±            | 6.98±0.57        | 9.87±0.89        |
| Root dry weight (g plant <sup>-1</sup> )         | 9.67±0.86        | 8.30±            | 7.33±0.64        | 9.50±0.87        |
| Leaf area (cm <sup>2</sup> )                     | 4.02±0.35        | 3.86±            | 3.92±0.31        | 4.33±0.35        |
| Number of leaves per plant                       | 122.14±11.3      | 249.16±          | 151.10±14.61     | 82.83±6.69       |
| Inflorescence length (cm)                        | 46.06±           | 66.00±0.53       | 66.00±5.82       | 42.00±3.81       |
| Root anatomy                                     |                  |                  |                  |                  |
| Root radius (μm)                                 | 793.42±71.73     | 587.50±55.09     | 720.74±68.43     | 963.01±90.3      |
| Epidermis thickness (μm)                         | 36.95±3.12       | 53.90±5.21       | 20.59±1.82       | 22.41±1.92       |
| Cortical cell area (μm <sup>2</sup> )            | 475.57±44.52     | 1924.77±190.76   | 2390.83±231.80   | 3105.92±299.33   |
| Endodermis thickness (μm)                        | 36.34±3.13       | 36.34±3.22       | 29.07±2.11       | 50.88±4.53       |
| Pericycle thickness (μm)                         | 27.26±2.23       | 21.80±1.88       | 27.26±2.56       | 23.02±1.99       |
| Metaxylem area (μm <sup>2</sup> )                | 8740.14±85.42    | 9656.70±935.48   | 3638.56±350.21   | 8025.92±798.43   |
| Phloem area (μm <sup>2</sup> )                   | 474.71±44.67     | 1599.65±150.82   | 1409.42±139.01   | 468.65±44.35     |
| Aerenchyma thickness (μm)                        | 0.00±0.00        | 90.85±8.91       | 145.36±12.43     | 54.51±4.65       |
| Pith thickness (μm)                              | 478.48±40.43     | 236.21±20.22     | 68.44±5.53       | 563.27±50.23     |
| Stem anatomy                                     |                  |                  |                  |                  |
| Stem radius (μm)                                 | 781.92±75.32     | 781.92±72.65     | 781.31±76.23     | 771.62±75.23     |
| Epidermis thickness (μm)                         | 44.82±3.36       | 19.99±1.53       | 27.26±2.56       | 72.68±69.80      |
| Cortical cell area (μm)                          | 7049.70±703.67   | 1337.65±130.66   | 6077.81±600.09   | 13732.78±1290.66 |
| Metaxylem area (μm <sup>2</sup> )                | 36.34±3.02       | 90.85±8.90       | 36.95±2.99       | 46.03±4.23       |
| Vascular bundle area (μm <sup>2</sup> )          | 31429.23±3001.43 | 5198.43±501.43   | 23380.83±2290.89 | 22862.03±2190.38 |
| Sclerenchyma thickness (μm)                      | 62.99            | 36.34±3.01       | 59.36±4.83       | 90.85±8.80       |
| Phloem area (μm <sup>2</sup> )                   | 7119.74±699.09   | 592.30±56.70     | 804.15±78.90     | 4906.17±487.6    |
| Leaf sheath anatomy                              |                  |                  |                  |                  |
| Leaf sheath thickness (μm)                       | 218.04±19.98     | 744.97±73.52     | 290.72±28.51     | 726.80±70.54     |
| Epidermis thickness (μm)                         | 23.62±2.01       | 21.80±1.90       | 21.80±2.01       | 27.26±2.523      |
| Vascular bundle area (μm <sup>2</sup> )          | 9331.58±927.88   | 24065.65±2387.33 | 6450.48±639.80   | 14533.47±1440.36 |
| Sclerenchyma thickness (μm)                      | 36.34±3.31       | 36.34±3.42       | 27.26±2.604      | 36.34±3.21       |
| Parenchyma cell area (μm <sup>2</sup> )          | 3897.96±385.77   | 7789.00±769.09   | 4157.36±412.66   | 5846.94±570.33   |
| Leaf blade anatomy                               |                  |                  |                  |                  |
| Epidermis thickness (μm)                         | 27.26±2.62       | 26.65±25.55      | 20.59±19.54      | 27.26±26.5       |
| Parenchyma cell area (μm <sup>2</sup> )          | 14542.12±1447.85 | 345.01±33.45     | 7252.90±723.87   | 2713.35±270.66   |
| Mesophyll thickness (μm)                         | 205.93±19.07     | 109.02±10.43     | 90.85±8.91       | 81.77±8.03       |
| Metaxylem area (μm <sup>2</sup> )                | 1117.16±110.76   | 302.64±30.31     | 316.47±31.43     | 313.01±29.33     |
| Phloem area (μm <sup>2</sup> )                   | 4549.92±450.78   | 1286.64±125.75   | 4212.70±420.35   | 2338.08±233.76   |
| Vascular bundle area (μm <sup>2</sup> )          | 23294.36±2300.96 | 8565.48±850.55   | 12968.41±1280.65 | 11818.39±1177.47 |
| Midrib thickness (μm)                            | 944.84±93.31     | 218.04±20.84     | 690.46±68.00     | 290.72±28.00     |
| Lamina thickness (μm)                            | 375.51±35.43     | 199.87±18.77     | 278.61±27.58     | 290.72±28.75     |
| Bulliform area (μm <sup>2</sup> )                | 4662.33±463.22   | 1174.23±116.44   | 1566.79±154.57   | 2345.00±232.65   |
| Adaxial stomatal density per mm <sup>2</sup>     | 52.70±5.01       | 78.20±7.64       | 75.40±7.32       | 81.90±8.00       |
| Abaxial stomatal density per mm <sup>2</sup>     | 54.10±5.32       | 69.00±6.54       | 77.40±7.43       | 83.10±7.91       |
| Adaxial stomatal area (μm <sup>2</sup> )         | 407.60±39.74     | 254.60±24.43     | 302.80±29.04     | 267.80±26.45     |
| Abaxial stomatal area (μm <sup>2</sup> )         | 339.60±33.84     | 210.50±20.13     | 236.70±23.55     | 155.40±15.42     |
| Physiology                                       |                  |                  |                  |                  |
| Total soluble proteins (μg g <sup>-1</sup> f w.) | 277.28±26.45     | 2475.51±245.73   | 1582.26±156.74   | 2631.33±262.00   |
| Total free amino acids (μg g <sup>-1</sup> f w.) | 6.99±0.65        | 7.42±0.72        | 5.62±0.49        | 6.66±0.64        |
| Total soluble sugars (mg g <sup>-1</sup> d w.)   | 27.31±2.61       | 30.66±2.97       | 26.94±2.56       | 29.62±2.84       |
| Glycine betaine (μmol g <sup>-1</sup> f w.)      | 26.30±2.57       | 29.55±2.65       | 30.21±3.00       | 34.02±3.40       |
| Proline (μmol g <sup>-1</sup> f w.)              | 158.54±15.4      | 317.48±30.45     | 260.57±25.01     | 266.46±25.7      |
| Chlorophyll <i>a</i> (mg g <sup>-1</sup> f w.)   | 1.68±0.15        | 1.69±0.14        | 1.42±0.12        | 1.48±0.13        |
| Chlorophyll <i>b</i> (mg g <sup>-1</sup> f w.)   | 1.15±0.10        | 1.23±0.11        | 1.17±0.14        | 0.90±0.009       |
| Total chlorophyll (mg g <sup>-1</sup> f w.)      | 2.83±0.26        | 2.93±0.26        | 2.59±0.23        | 2.38±0.21        |
| Shoot Na <sup>+</sup> (mg g <sup>-1</sup> f w.)  | 19.50±1.86       | 35.20±3.53       | 68.70±6.52       | 29.80±2.85       |
| Shoot K <sup>+</sup> (mg g <sup>-1</sup> f w.)   | 30.63±3.01       | 27.22±2.65       | 24.81±2.31       | 27.82±2.65       |
| Shoot Ca <sup>2+</sup> (mg g <sup>-1</sup> f w.) | 7.55±0.73        | 10.67±1.00       | 8.93±0.83        | 9.89±0.93        |
| Carotenoids (mg g <sup>-1</sup> f w.)            | 0.04±0.004       | 0.05±0.005       | 0.03±0.003       | 0.07±0.003       |
